# Supplementary material
Source: PubMed Central journal article supplement (PMC6643416)
Supplement: ao7b01016_si_001.pdf [file ao7b01016_si_001.pdf]

# Core-Shell Nanoparticles as an Efficient, Sustained and Triggered Drug Delivery System

Sonal Deshpande,<sup>†</sup> Sapna Sharma,<sup>†</sup> Veena Koul,<sup>†,‡</sup> and Neetu Singh\*<sup>†,‡</sup>

<sup>†</sup>Centre for Biomedical Engineering, Indian Institute of Technology-Delhi, Hauz Khas, New Delhi-110016, India.

<sup>‡</sup>Biomedical Engineering Unit, All India Institute of Medical Sciences, Ansari Nagar, New Delhi-110029, India.

## Supporting Information

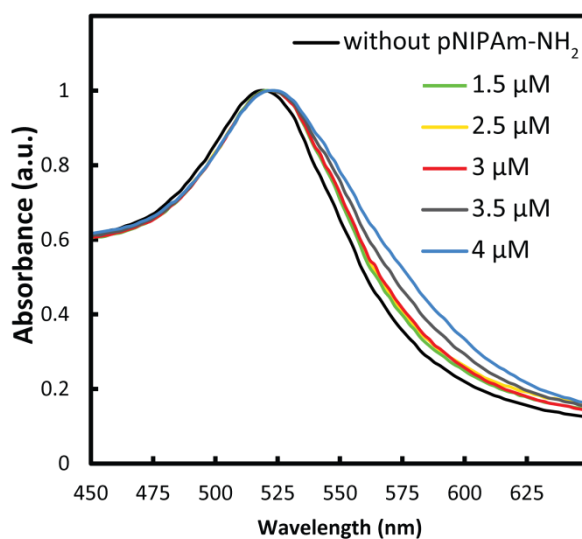

**Figure S1:** Optimization of the concentration of amine terminated poly-*N*-isopropylacrylamide for coating the AuNPs without any aggregation.

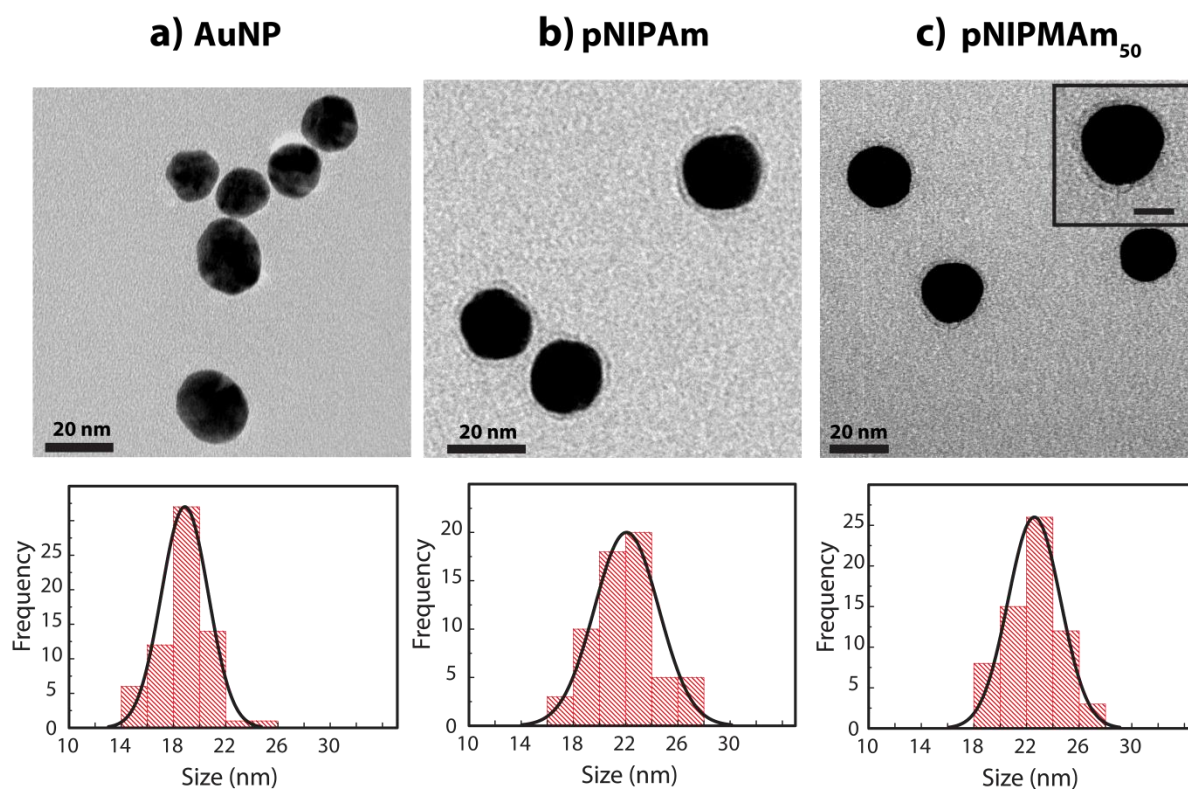

**Figure S2:** Transmission electron micrographs and size distribution analysis of a) AuNPs, b) pNIPAm and c) pNIPMAM<sub>50</sub> nanoparticles. AuNPs: gold nanoparticles; pNIPAm: AuNP core with pNIPAm shell; pNIPMAM<sub>50</sub>: AuNP core with p(NIPAm-co-NIPMAM) shell composed of 1:1 ratio of NIPAm/NIPMAM.

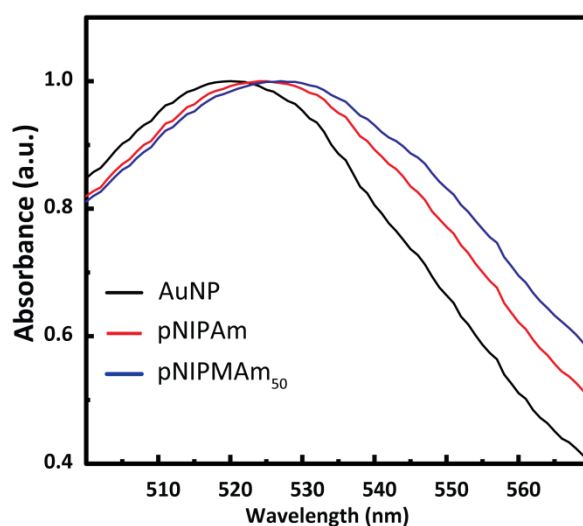

**Figure S3:** Absorbance spectra of AuNP and core-shell nanoparticles, showing shift in absorbance maxima.

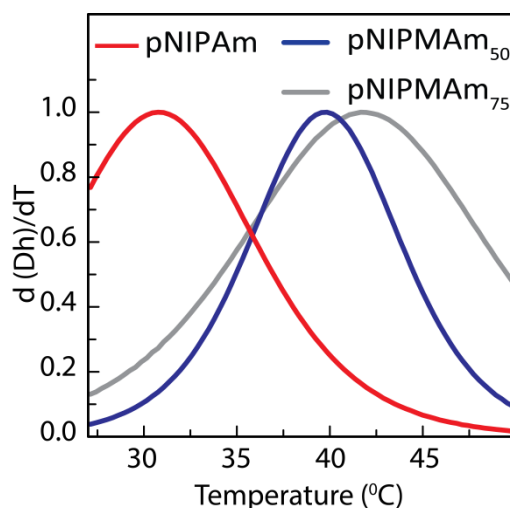

**Figure S4:** Rate of change of the hydrodynamic diameter of core-shell nanoparticles with respect to temperature.

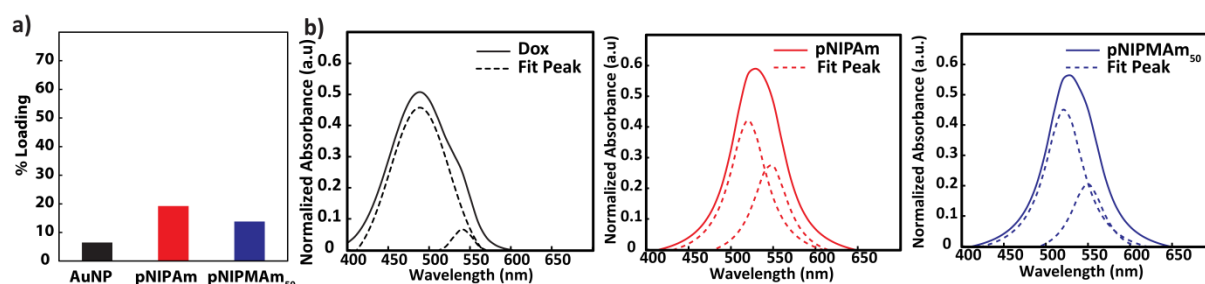

**Figure S5:** a) Doxorubicin loading efficiency of AuNPs, pNIPAm and pNIPMAm. b) Absorbance spectra of doxorubicin (Dox) and doxorubicin loaded pNIPAm and pNIPMAm. On deconvolution, the doxorubicin loaded core-shells showed a peak at 520 nm, corresponding to AuNPs and at 540 nm, corresponding to one of the doxorubicin peaks. AuNPs: gold nanoparticles; pNIPAm: AuNP core with pNIPAm shell; pNIPMAm<sub>50</sub>: AuNP core with p(NIPAm-co-NIPMAm) shell composed of 1:1 ratio of NIPAm/NIPMAm.

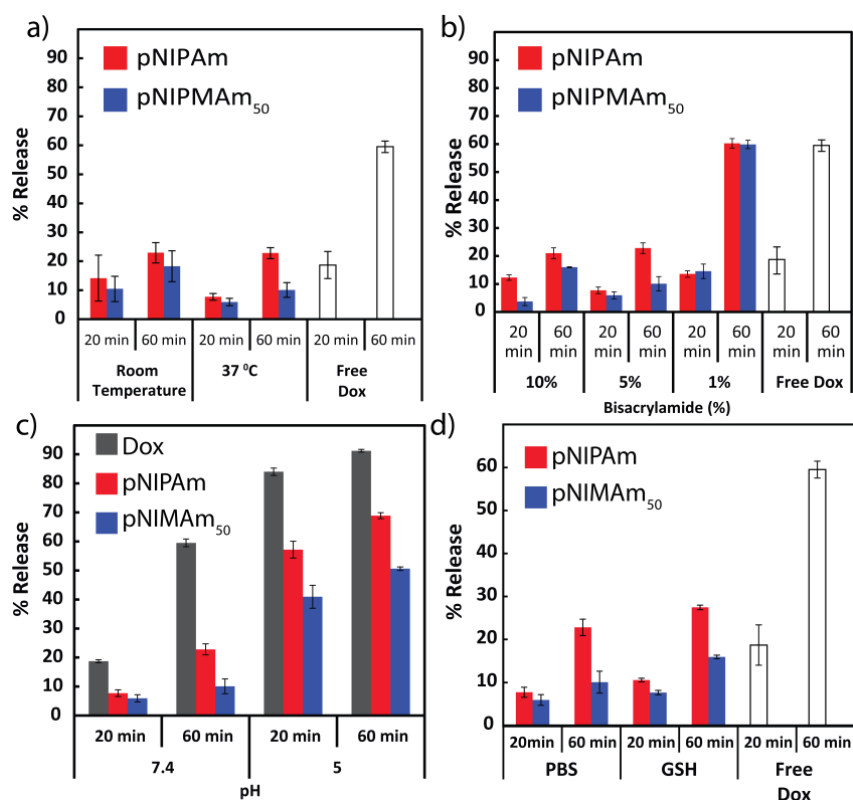

**Figure S6:** Comparative release of doxorubicin from core-shell nanoparticles a) at room temperature and 37°C, b) different crosslinking density of bisacrylamide at 37°C, c) at pH 5 and pH 7.4 at 37°C and d) in presence of 10 mM glutathione. pNIPAm: AuNP core with pNIPAm shell; pNIPMAm<sub>50</sub>: AuNP core with p(NIPAm-co-NIPMAm) shell composed of 1:1 ratio of NIPAm/NIPMAm.

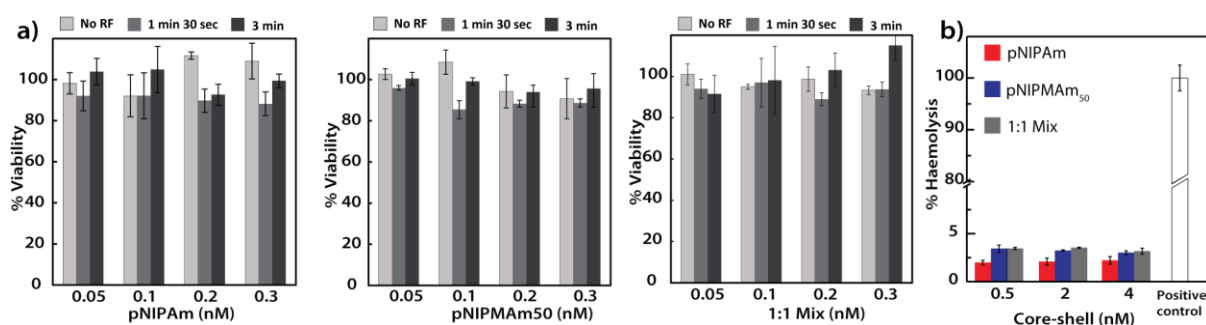

**Figure S7:** Concentration dependent viability of HeLa cells treated with a) pNIPAm, pNIPMAm<sub>50</sub> and 1:1 Mix, on exposure to RF and analyzed by MTT assay. b) Haemolysis assay for the core-shell nanoparticles. AuNPs: gold nanoparticles; pNIPAm: AuNP core with pNIPAm shell; pNIPMAm<sub>50</sub>: AuNP core with p(NIPAm-co-NIPMAm) shell composed of 1:1 ratio of NIPAm/NIPMAm, 1:1 Mix: mixture of pNIPAm and pNIPMAm<sub>50</sub> nanoparticles in 1:1 ratio.

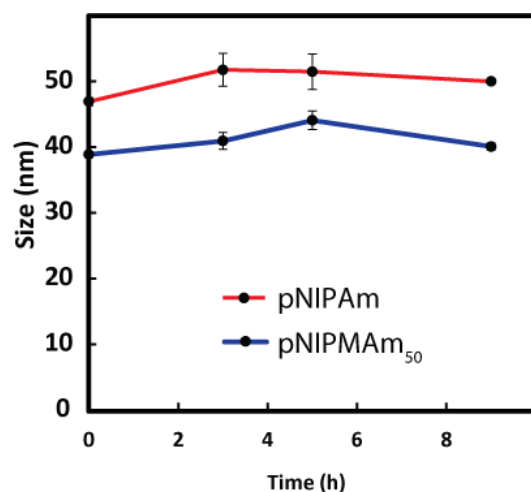

**Figure S8:** Stability of core-shell in 10% FBS analyzed by monitoring the change in size by dynamic light scattering. pNIPAm: AuNP core with pNIPAm shell; pNIPMAM<sub>50</sub>: AuNP core with p(NIPAm-co-NIPMAM) shell composed of 1:1 ratio of NIPAm/NIPMAM.

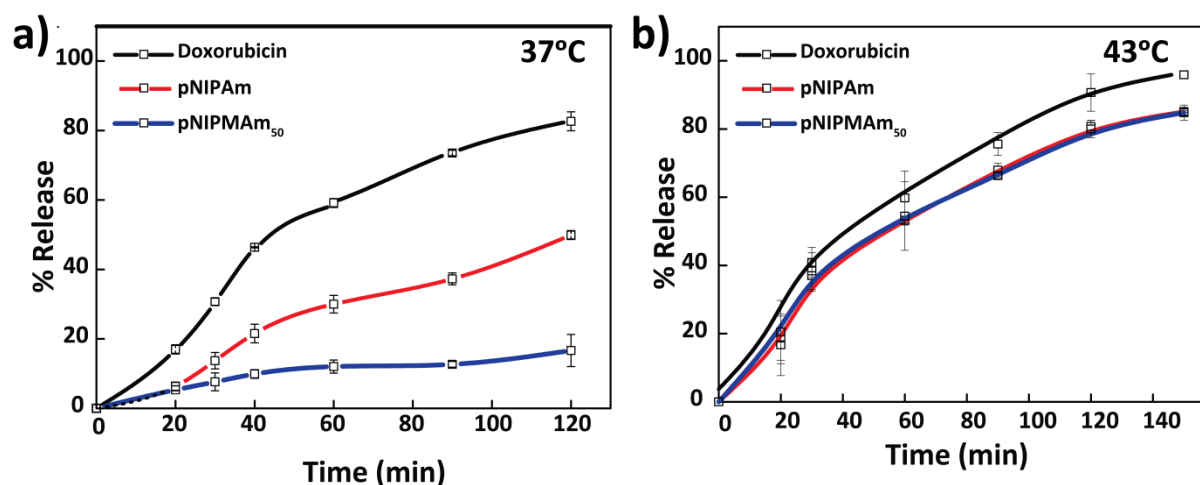

**Figure S9:** Release profile of doxorubicin from the core-shell nanoparticles. The release was carried out at a) 37°C and b) 43°C. pNIPAm: AuNP core with pNIPAm shell; pNIPMAM<sub>50</sub>: AuNP core with p(NIPAm-co-NIPMAM) shell composed of 1:1 ratio of NIPAm/NIPMAM.

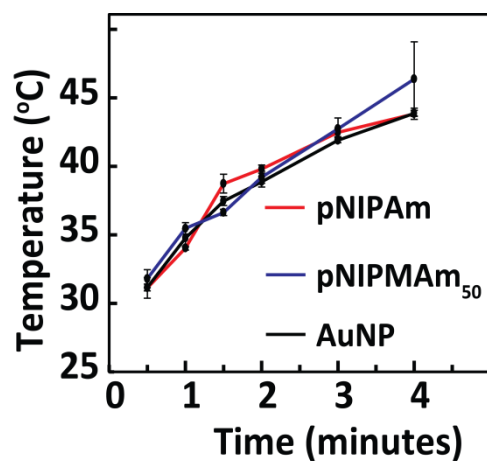

**Figure S10:** Heating rate of AuNP and core-shell nanoparticles with different shell compositions. AuNP: gold nanoparticles; pNIPAm: AuNP core with pNIPAm shell; pNIPMAm<sub>50</sub>: AuNP core with p(NIPAm-co-NIPMAm) shell composed of 1:1 ratio of NIPAm/NIPMAm.
